# Supplementary material for: Comparison of Leaf Sheath Transcriptome Profiles with Physiological Traits of Bread Wheat Cultivars under Salinity Stress
Source: PLoS One. 2015 Aug 5;10(8):e0133322. doi: 10.1371/journal.pone.0133322 (PMC4526543; doi:10.1371/journal.pone.0133322)
Supplement: S5 Table — Listed are genes whose expression was reduced more than five-fold in Drysdale compared with the other cultivars under salinity stress conditions. p values of <0.01 were included. Asterisk indicates stress- and/or abscisic acid treatment-inducible gene in rice and Arabidopsis. aProbe name as given by Agilent 44K wheat gene expression array (Design ID: 022297). bLocus indicates GenBank accession. cLoad ID as given by RAP-DB. dAGI, Arabidopsis Genome Initiative. eDescription as given by The Institute for Genomic Research database. (XLSX) [file pone.0133322.s005.xlsx]

## Sheet: S5 Table
	Probe Name a	Locus b	Log fold-change		Load ID c	AGI code d	Descriptions e
			Drysdale
			1 Day	3 Day
	A_99_P094315	CD933683	-2.43635		Os11g0557000		Phytosulfokine family protein
	A_99_P341226	AK334232		-2.92401			Unknown
	A_99_P111655	DR732153		-2.67455			Unknown
	A_99_P011684	CV769089		-2.35955			Unknown
